# Supplementary material
Source: PubMed Central journal article supplement (PMC6495174)
Supplement: 10.1194_M091066_jlr.M091066-2.pdf [file 10.1194_M091066_jlr.M091066-2.pdf]

**A.**

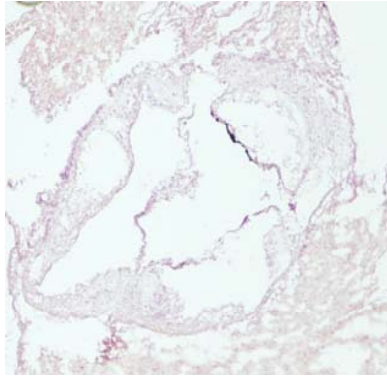

**B.**

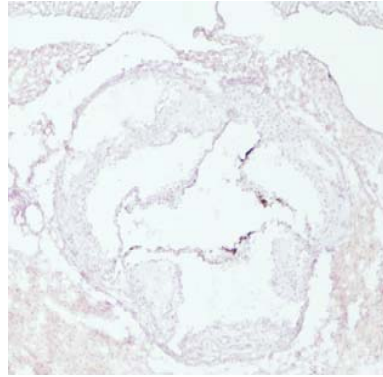

**Supplemental Figure S2: *Immunohistochemical controls.*** (A.) Aortic root section with no primary antibody and (B.) sections with isotype matched primary antibody following the same staining protocol as described in Methods.
