# Supplementary material
Source: PubMed Central journal article supplement (PMC6495174)
Supplement: 10.1194_M091066_jlr.M091066-3.pdf [file 10.1194_M091066_jlr.M091066-3.pdf]

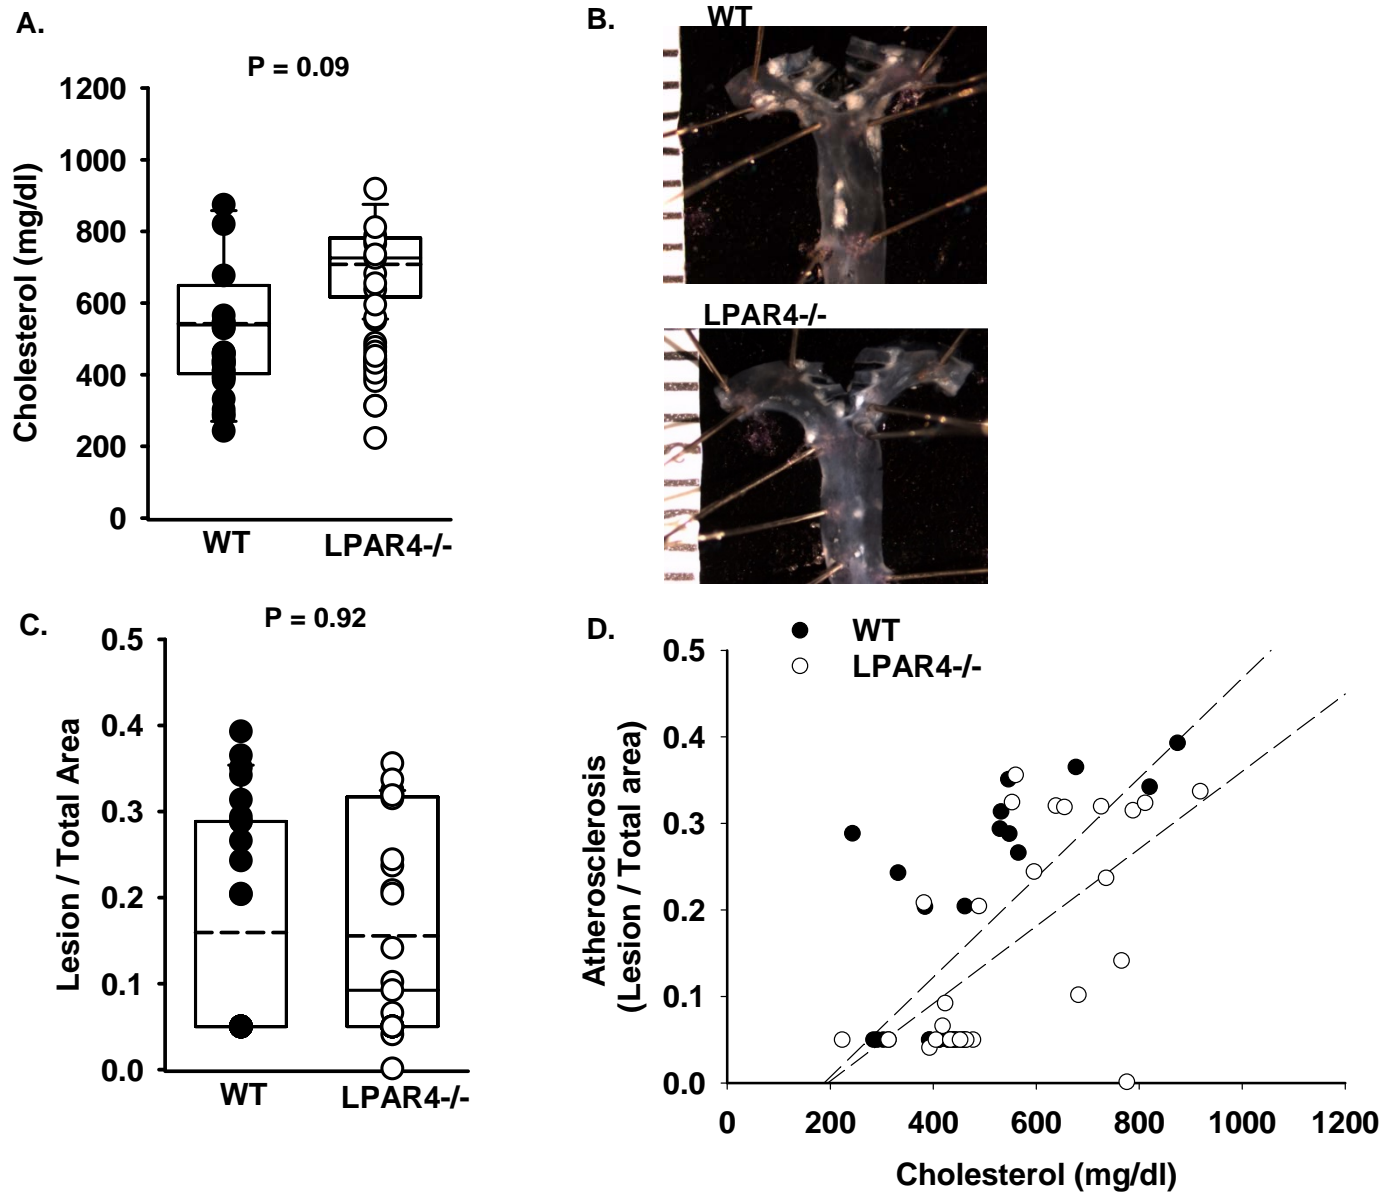

**Supplemental Figure S3: *LPAR4*-deficiency in female mice does not reduce atherosclerosis.** **A.**, Total cholesterol in plasma from individual WT (dark circles; n = 27) or *Lpar4*<sup>-/-</sup> (open circles; n = 29) mice injected with PCSK9D377Y.AAV (P = 0.09; Mann-Whitney rank sum test). **B.** Images of representative aortas from WT and *Lpar4*<sup>-/-</sup> mice injected with PCSK9D377Y.AAV after 20 weeks on Western diet. **C.**, Atherosclerotic lesion / total area from the ascending aorta to 3 mm below the subclavian artery was measured by an en face method. P = 0.92 Mann-Whitney rank sum test **D.** Atherosclerosis lesion area plotted as a function of plasma cholesterol.
