# Supplementary material
Source: PubMed Central journal article supplement (PMC6495174)
Supplement: 10.1194_M091066_jlr.M091066-4.pdf [file 10.1194_M091066_jlr.M091066-4.pdf]

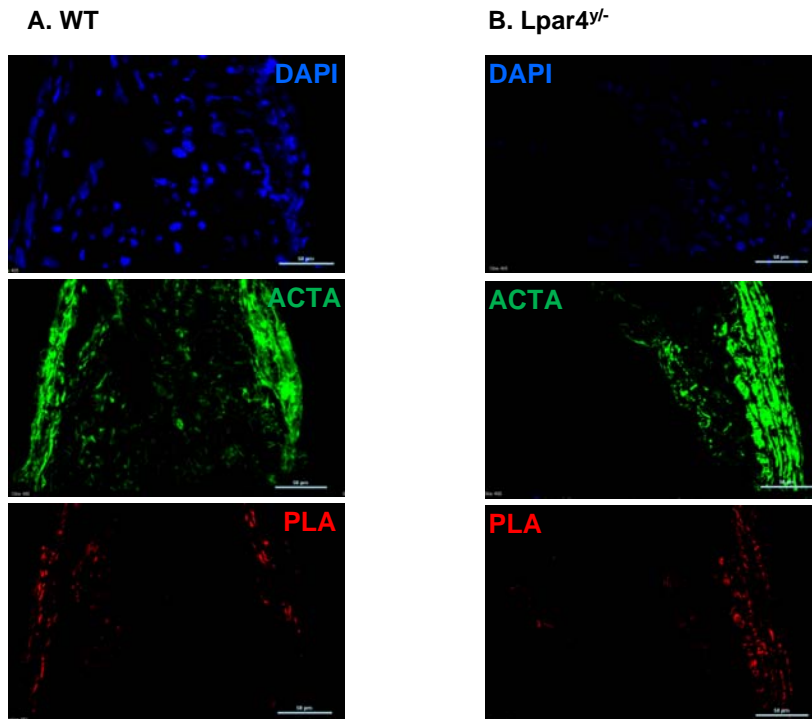

**Supplemental Figure S4: ISH-PLA Assay. A.**, Representative aortic root section from WT mouse stained with DAPI (blue), ACTA2 (smoothmuscle a-actin; green) and PLA for H3K4dime marker of the MYH11 locus (red). **B.** Representative images from Lpar4<sup>Y/-</sup> animal. Quantification presented in Figure 4B and overlay in 4C.
