# Supplementary material
Source: PubMed Central journal article supplement (PMC6495174)
Supplement: 10.1194_M091066_jlr.M091066-5.pdf [file 10.1194_M091066_jlr.M091066-5.pdf]

Supplemental Table S1: TaqMan® gene expression (ThermoFisher) assays used

| Gene Symbol | Assay ID      | Gene Symbol | Assay ID      |
|-------------|---------------|-------------|---------------|
| F3          | Mm00438855_m1 | Lpar4       | Mm01228533_m1 |
| Ctgf        | Mm01192933_g1 | Acta2       | Mm00725412_s1 |
| Sra1        | Mm00491755_m1 | Il6         | Mm00446190_m1 |
| Scaf1       | Mm01203886_m1 | Cd68        | Mm03047343-m1 |
| CD14        | Mm00438094_g1 | Tgfa        | Mm00436978_m1 |
| CD36        | Mm01135198_m1 | IL-10       | Mm00439614_m1 |
| Arg1        | Mm00475988_m1 | Tnfa        | Mm99999068_m1 |
| Klf4        | Mm00516105_g1 | KLF6        | Mm00516184_m1 |
