# Supplementary material
Source: PubMed Central journal article supplement (PMC6495174)
Supplement: 10.1194_M091066_jlr.M091066-6.pdf [file 10.1194_M091066_jlr.M091066-6.pdf]

Supplemental Table S2: Complete Blood Counts in WT and Lpar4<sup>Y/-</sup> mice on normal chow and Western diet (mean  $\pm$  SD).

|                             | Normal Chow    |                      | Western Diet    |                      |
|-----------------------------|----------------|----------------------|-----------------|----------------------|
|                             | WT             | Lpar4 <sup>Y/-</sup> | WT              | Lpar4 <sup>Y/-</sup> |
| <b>Hgb (g / dL)</b>         | 13.1 $\pm$ 1.4 | 14.4 $\pm$ 1.1       | 13.7 $\pm$ 1.7  | 12.6 $\pm$ 2.7       |
| <b>PLT (K / ml)</b>         | 927 $\pm$ 280  | 952 $\pm$ 348        | 721 $\pm$ 330   | 422 $\pm$ 61         |
| <b>WBC (K / ml)</b>         | 7.5 $\pm$ 3.0  | 10.9 $\pm$ 1.6       | 10.7 $\pm$ 2.9  | 10.6 $\pm$ 4.5       |
| <b>Neutrophils (K / ml)</b> | 0.9 $\pm$ 0.15 | 1.4 $\pm$ 0.2        | 1.1 $\pm$ 0.6   | 1.2 $\pm$ 0.3        |
| <b>Monocytes (K / ml)</b>   | 0.2 $\pm$ 0.14 | 0.2 $\pm$ 0.05       | 0.42 $\pm$ 0.11 | 0.4 $\pm$ 0.26       |
